# Supplementary material for: Genome-Wide Identification and Characterization of Tea SGR Family Members Reveal Their Potential Roles in Chlorophyll Degradation and Stress Tolerance
Source: MDPI journal article supplement (doi:10.3390/agronomy14040769), 2024-04-08
Supplement: s1 [file s1]

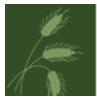

**Supplementary Figure S1.** Phylogenetic analysis of the tea putative CsSGRs with SGRs of other species.

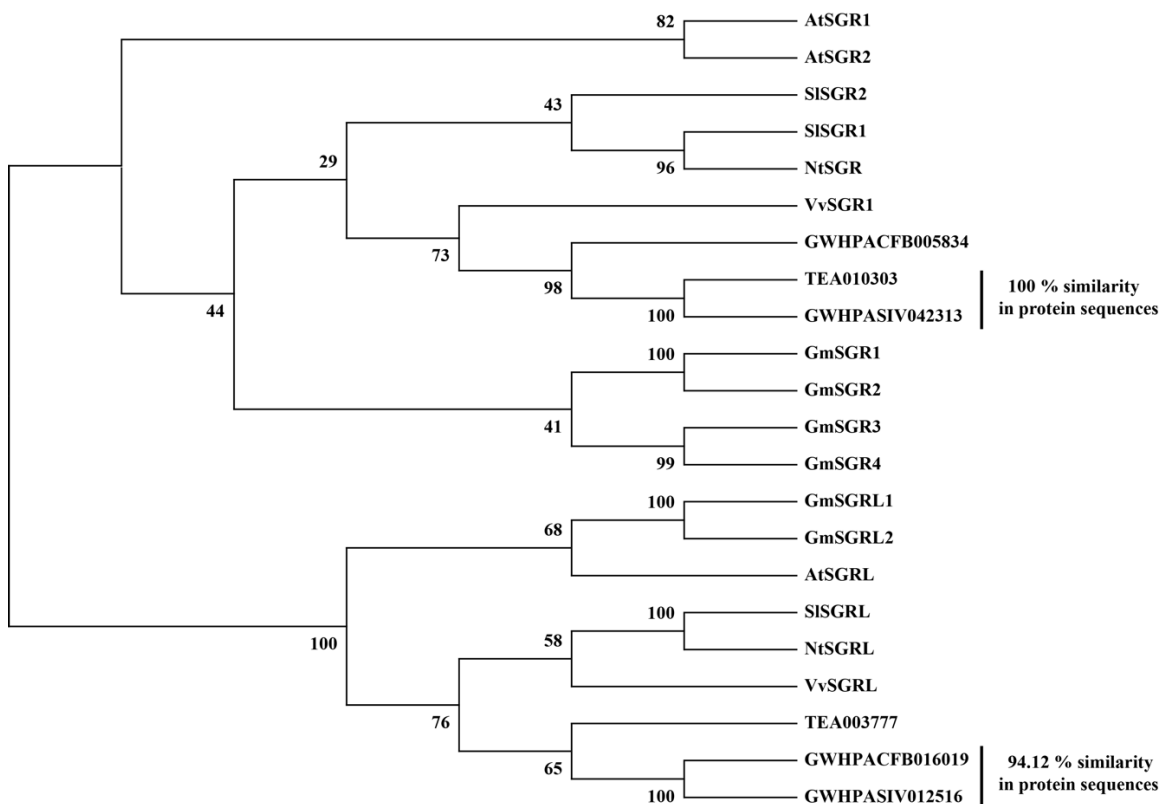

### Supplementary materials

**Supplementary Table S1.** Primers used for the cloning of *CsSGR1*, *CsSGR2* and *CsSGRL*.

| Primers name   | Primer sequence (5'-3')                                    | Note                                                                            |
|----------------|------------------------------------------------------------|---------------------------------------------------------------------------------|
| CsSGR1-F       | ATGGGTACTCTGACCACTTCTCTTG                                  | Primers used for the cloning of <i>CsSGR1</i> , <i>CsSGR2</i> and <i>CsSGRL</i> |
| CsSGR1-R       | TTGACCCCACCAGAAGGAGC                                       |                                                                                 |
| CsSGR2-F       | GTGTCCTGAGAAGTTGGAGCTTG                                    |                                                                                 |
| CsSGR2-R       | CACATCCCAGAAAGGCAGACAAG                                    |                                                                                 |
| CsSGRL-F       | TGTTGGTTGGGTGGAAGTGG                                       |                                                                                 |
| CsSGRL-R       | GGAGCTTACCAGTTTGCCCT                                       |                                                                                 |
| CsSGR1-qF      | ACTTCTCTTGTGCTTCCATCAGG                                    | Primers used for RT-qPCR                                                        |
| CsSGR1-qR      | AAATATAGCTGGCCCAAATAACC                                    |                                                                                 |
| CsSGR2-qF      | GAGTGAAGAAAGTCCAGGAGA                                      |                                                                                 |
| CsSGR2-qR      | ACCCAAACCAGAGCTTCCTC                                       |                                                                                 |
| CsSGRL-qF      | GACCTACACCCTCTCCCACT                                       |                                                                                 |
| CsSGRL-qR      | TCCTTCCACTCAGCAACGAC                                       |                                                                                 |
| CsPTB-F        | ACCAAGCACACTCCACACTATCG                                    | Primers used for the construction of subcellular localization vectors           |
| CsPTB-R        | TGCCCCCTTATCATCATCCACAA                                    |                                                                                 |
| p35S::CsSGR1-F | <u>cgagctcgggtaccg</u> gggatccATGGGTACTCTGACCACTTCTCTTG    |                                                                                 |
| p35S::CsSGR1-R | <u>ccttgctcaccatggtgtcgac</u> TTGACCCCACCAGAAGGAGC         |                                                                                 |
| p35S::CsSGR2-F | <u>cgagctcgggtaccg</u> gggatccATGGGTACTTTGACTGCTTCTCTTG    |                                                                                 |
| p35S::CsSGR2-R | <u>ccttgctcaccatggtgtcgac</u> ATCATAGAGTTGTGTAAGACCATCTTTG |                                                                                 |
| p35S::CsSGRL-F | <u>cgagctcgggtaccg</u> gggatccATGCATTCCATGGCCTGTCATTC      |                                                                                 |

Note: Underlined lowercase letters indicate homologous sequences with the vectors.

**Supplementary Table S2.** The six candidate CsSGR homologs obtained for tea genome via bioinformatic analysis.

| Gene ID         | Reference genome     |
|-----------------|----------------------|
| >GWHTACFB005834 | 'Longjing 43' genome |
| >GWHTACFB016019 |                      |
| >TEA010303      | 'Shuchazao' genome   |
| >TEA003777      |                      |
| >GWHTASIV012516 | 'Tieguanyin' genome  |
| >GWHTASIV042313 |                      |

**Supplementary Table S3.** The numbers of *cis*-elements in promoters of *CsSGR1*, *CsSGR2* and *CsSGRL*.

| Genes         | Cis-elements                          | Numbers |
|---------------|---------------------------------------|---------|
| <i>CsSGR1</i> | Light responsive element              | 2       |
|               | Auxin-response element                | 1       |
|               | Salicylic acid responsive element     | 2       |
|               | MeJA-responsive element               | 2       |
|               | Gibberellin-responsive element        | 1       |
|               | Anaerobic induction element           | 1       |
|               | Low-temperature responsive element    | 2       |
|               | Defense and stress responsive element | 1       |
| <i>CsSGR2</i> | Light responsive element              | 1       |
|               | Absciscic acid responsive element     | 1       |
|               | Gibberellin-responsive element        | 6       |
|               | Anoxic specific inducibility element  | 1       |
| <i>CsSGRL</i> | Light responsive element              | 5       |
|               | MeJA-responsive element               | 2       |
|               | Absciscic acid responsive element     | 2       |
|               | Defense and stress responsive element | 1       |
